# Supplementary material
Source: MDPI journal article supplement (https://www.mdpi.com/2073-4433/14/6/1007)
Supplement: s1 [file s1]

Supplementary Material

# Comparison of Lichens and Mosses as Biomonitors of Airborne Microplastics

Mehriban Jafarova <sup>1</sup>, Lisa Grifoni <sup>1</sup>, Julian Aherne <sup>2\*</sup> and Stefano Loppi <sup>1</sup>

<sup>1</sup> Department of Life Sciences, University of Siena, 53100 Siena, Italy; mehriban.jafarova@student.unisi.it (M.J.); l.grifoni2@student.unisi.it (L.G.); stefano.loppi@unisi.it (S.L.)

<sup>2</sup> School of Environment, Trent University, Peterborough, ON K9L 0G2, Canada

\* Correspondence: jaherne@trentu.ca

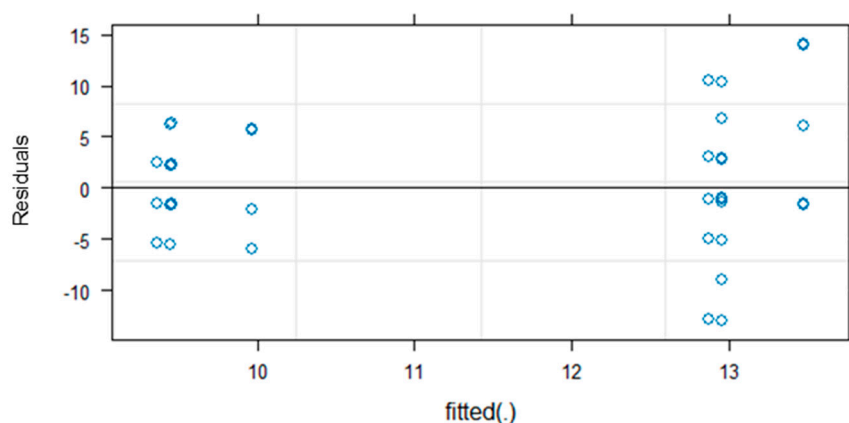

**Figure 1S.** Linear mixed-effect model plot performed in R (lme4 package).

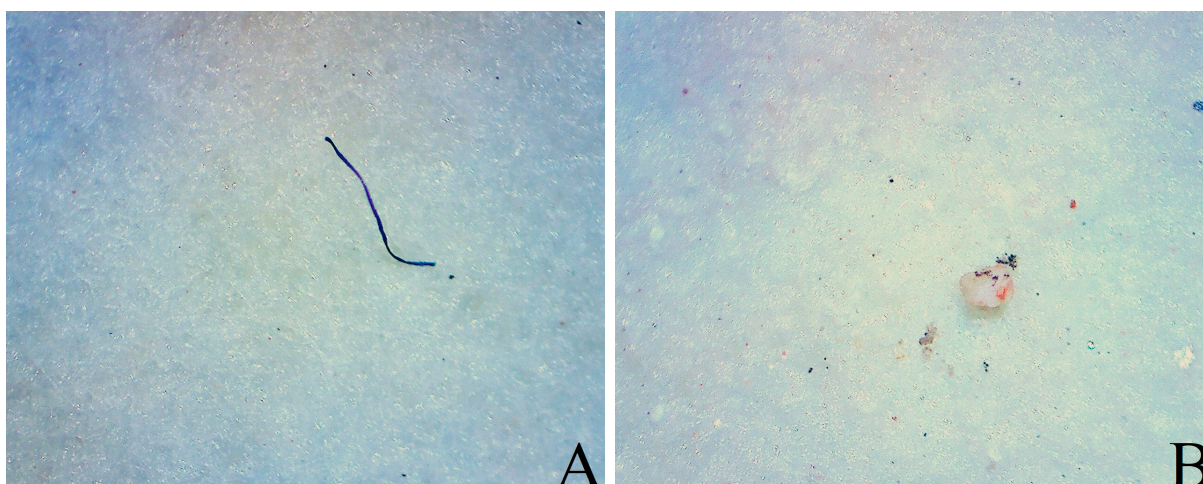

**Figure 2S.** Example images of the extracted microplastics from lichen and moss samples (A – blue microfibre, L = 1147 µm; B – fragment, L = 379 µm; L – length).
